# Supplementary material
Source: PubMed Central journal article supplement (PMC8999990)
Supplement: 40615_2022_1294_MOESM1_ESM.pdf [file 40615_2022_1294_MOESM1_ESM.pdf]

# Appendix Table 1: Quantitative Survey

---

Name/Initials of Interviewer:

---

---

Name of Study Participant:

---

---

Participant Identified Sex or Gender:

- Female  
 Male  
 Other

---

Participant Age:

---

((years))

---

## Barriers and Facilitators to Prevention and Care of COVID-19 infections

---

¿Qué es el COVID?

What is COVID?

---

---

¿Cuáles son los síntomas del COVID?

What are the symptoms of COVID?

---

---

¿Cómo puede protegerse usted y a otros del COVID?

How can you protect yourself and others from COVID?

---

---

¿Debería ir a trabajar si tengo síntomas?

- Yes  
 No

Should you go to work if you have symptoms?

---

¿Debería ir a trabajar si tengo un resultado positivo de COVID pero no tengo síntomas?

- Yes  
 No

Should you go to work if you are positive for COVID but don't have symptoms?

¿Cuáles son sus Medios principales de información sobre el coronavirus (COVID-19) (Marque todo lo que corresponda)?

What are your primary sources of information about the coronavirus (COVID-19)

- Noticias de Televisión Nacional/National TV News  
 Noticias de Televisión Local/Local TV News  
 Radio Local/Local Radio  
 Periódicos Nacionales /National Newspaper (USA today, Wall Street Journal, etc)  
 Periódicos Locales/Local Newspaper  
 Medios Sociales /Social Media (Facebook, YouTube, Twitter, Instagram, Next-door, WhatsApp)  
 Amigos/Familiares/Colegas // Friends/Family/Colleagues  
 Grupos Comunitarios y Religiosos /Community groups or religious groups  
 Profesionales de la Salud /Health Professionals  
 Búsquedas por paginas del Internet Local/Nacional // Local/National Websites via search engines  
 ¿Otros? // Other  
 (select all that apply)

¿Cuáles grupos comunitarios y religiosos ?

Which community groups or religious group?

\_\_\_\_\_

¿Cuál clínica/hospital o profesional de la salud?

Which clinic/hospital or health professional?

\_\_\_\_\_

¿Cuáles otras fuentes de información?

What "other" source of information?

\_\_\_\_\_

¿Usted utiliza un cubrebocas (tapabocas)?

Do you wear a mask?

- Yes  
 No

¿En qué situaciones lo utiliza?

Where are you wearing a mask?

- En la casa/At home  
 Adentro en sitios públicos/Inside public places  
 En el trabajo/At work  
 Afuera en público/Outside public places  
 En el supermercado/At the grocery store  
 (check all that apply)

¿Está practicando el distanciamiento social (físico)? (p. ej.: disminuyendo su contacto físico con otras personas en sitios sociales, de trabajo, y de educación por medio de mantenerse de 3-6 pies de distancia de otros y evitando grupos grandes)?

Have you practiced social distancing (i.e., reducing physical contact with other people in work, school, or socially by avoiding groups and staying 6 feet away from other people)?

- Yes  
 No

¿Cuándo lo comenzó a hacer?

When did you start?

\_\_\_\_\_

¿Le ha tocado parar el distanciamiento social?

Have you stopped practicing social distancing?

- Yes  
 No

---

When did you stop practicing social distancing?

---

¿Lo decidió usted?

- Yes  
 No

Did you choose to stop?

---

¿Otra persona le exigió que lo hiciera?

- Yes  
 No

Did someone else require you to stop?

---

¿Lo hizo para proteger o cuidar a alguien en su casa?

- Yes  
 No

Did you do this to protect or care for someone else in your household?

---

¿Con que frecuencia está dentro de 6 pies (2 metros) de otra persona?

- Almost never  
 Less than one time a month  
 Less than one time a week  
 Several times a week  
 Daily  
 Other

How often are you closer than 6 feet from other people?

---

Please specify the "other" frequency with which you are closer than 6 feet from other people

---

¿Ha tenido que aislarse o mantenerse en cuarentena mientras ha estado enfermo o porque ha sido expuesto a alguien enfermo?

- Yes  
 No

Have you had to isolate or quarantine yourself while sick or because you were exposed?

---

¿Por cuánto tiempo lo ha hecho o lo hizo? [en días]

How long have you been doing/did you do this for? [days]

---

¿Le tocó interrumpir la cuarentena o el aislamiento?

- Yes  
 No

Did you have to break isolation or quarantine?

---

¿Con que frecuencia?

How often?

- Daily  
 Several times a week  
 Less than one time a week  
 Less than one time a month  
 Other
- 

Why did you have contact with someone during isolation or quarantine?

---

¿Lo decidió usted?

- Yes  
 No

Did you choose to have contact yourself?

---

---

¿Otra persona le exigió que lo hiciera?  Yes  
 No

Did someone else require you to have contact?

---

¿Lo hizo para proteger o cuidar de alguien en su casa?  Yes  
 No

Did you do this to protect or care for someone else in your household?

---

¿Desde marzo ha utilizado servicios de salud (p.ej., ha llamado a su Doctor, ha ido a un Urgent Care, a la Sala de Emergencias, etc.)?  Yes  
 No

Since March, have you used healthcare services (e.g., called your healthcare provider, went to urgent care, the emergency department, etc.)?

---

¿Estas visitas han incrementado o disminuido comparadas a los meses anteriores a marzo?  Incrementado/Increased  
 Disminuido/Decreased  
 Igual/Same

Was this an increase or decrease of services used before March?

---

¿Se ha enfermado del COVID?  Yes  
 No

Did you get sick with COVID?

---

¿Ha sido expuesto(a) al COVID?  Yes  
 No

Were you exposed to COVID?

---

¿Alguien en su casa se ha enfermado del COVID?  Yes  
 No

Did a household member get sick with COVID?

---

¿Alguien en su casa se ha expuesto al COVID?  Yes  
 No

Did a household member get exposed to COVID?

---

¿Fue a hacerse una prueba del COVID?  Yes  
 No

Did you get tested for COVID?

---

¿Por qué no se hizo la prueba?

Why didn't you get tested?

---

Si se enferma, ¿Dónde obtiene medicamentos para tratar sus síntomas?

If you get sick, where do you get medications to treat your symptoms?

---

Si no ha estado enfermo o expuesto a COVID, ¿se le hizo la prueba de COVID?

- Yes  
 No  
 Was sick or exposed to COVID

If you have not been sick or exposed to COVID, were you tested for COVID?

Si es así ¿Por qué prueba COVID?

If Yes, why were you tested for COVID? \_\_\_\_\_

Si hay una oportunidad de prueba de covid-19 en el futuro, ¿tomará la prueba?

- Yes  
 No

If there is a COVID testing opportunity in the future, will you take the test?

En caso afirmativo, ¿por qué quiere hacerse la prueba de COVID?

If yes, why do you want to be tested for COVID? \_\_\_\_\_

Si la respuesta es no, ¿por qué no quiere hacerse la prueba de COVID?

If no, why do you not want to be tested for COVID? \_\_\_\_\_

Por favor marque si se ha preocupado porque se le agote la comida antes de tener más dinero para comprar más comida (Marque todo lo que corresponda)?

- Si, desde antes de marzo / Before March  
 Si, desde marzo / Since March  
 No, no antes de marzo ni después de marzo / No, not before March and not after March

Please indicate if you are worried whether your food would run out before you got money to buy more.

Por favor marque si se ha preocupado por lo siguiente (Marque todo lo que corresponda):  
 ¿problemas de vivienda de los cuales no ha recibido ayuda del dueño como: demasiadas personas en el casa, cucarachas, ratas u otros roedores, moho, plomo, servicios públicos (agua; energía)?

- Si, desde antes de marzo / Before March  
 Si, desde marzo / Since March  
 No, no antes de marzo ni después de marzo / No, not before March and not after March

Housing problems such as overcrowding, roaches, utilities, mold, or lead that your landlord is not helping with?

Por favor marque si se ha preocupado por lo siguiente (Marque todo lo que corresponda):

¿amenazas de perder su casa o ser desalojado?

Being threatened with eviction or losing your home?

- Si, desde antes de marzo / Before March  
 Si, desde marzo / Since March  
 No, no antes de marzo ni después de marzo / No, not before March and not after March

¿Está trabajando?

- Yes  
 No

Are you working?

¿Está preocupado de perder su trabajo y sus ingresos debido al COVID?

- Yes  
 No

Are you worried about losing your job/source of income due to COVID?

¿Perdió su trabajo o sus ingresos debido al COVID-19/coronavirus?

- Yes  
 No

Did you lose your source of income because of COVID-19/coronavirus?

¿Por qué?

Why?

- porque estoy/estaba enfermo o en cuarentena // Because I am/was sick or under quarantine  
 porque alguien en mi casa estaba enfermo o en cuarentena // Because someone in my household was sick/under quarantine  
 porque mi sitio de empleo estaba cerrado sin opción de trabajar en casa // Because my place of work was closed and no remote work option  
 porque me despidieron // Because I was laid off or lost my employment  
 Otros // Other  
 (check all that apply)

Please specify the other reason why you lost your source of income because of COVID?

¿Ha estado preocupado por ser deportado, detenido, o separado de su familia por el departamento de Inmigración de los Estados Unidos o que le ocurra a un familiar suyo o a un miembro de su comunidad antes de marzo?

- Yes  
 No

Were you concerned about deportation, detention, or family separation by United States immigration for yourself, a family member, or a community member before March?

¿Y después de marzo?

And after March?

- Yes  
 No

¿Afecta esto la disposición de usted, de su familiar o de su comunidad a buscar asistencia para:

Does this affect your, your family member's or your community member's willingness to seek assistance for:

Problemas médicos

Medical concerns

- Yes  
 No

Alimentos

Food

- Yes  
 No

Vivienda

Housing

- Yes  
 No

---

¿Otros comentarios?

Other comments? \_\_\_\_\_

---

**Question for Interviewer**

Would you like to complete the qualitative questions with this study participant at this time?

- Yes
- No
