# Supplementary material
Source: PubMed Central journal article supplement (PMC8999990)
Supplement: 40615_2022_1294_MOESM2_ESM.pdf [file 40615_2022_1294_MOESM2_ESM.pdf]

## Appendix Table 2: Qualitative Interview

**Estas son las preguntas cualitativas de la encuesta [study\_participant]**

**These are the qualitative survey questions for [study\_participant]**

- 1) Cuénteme sobre las personas de su familia.  
Tell me about the people in your family. \_\_\_\_\_

---

- 2) ¿Qué cosas hacen en familia?  
What kinds of things do you do as a family? \_\_\_\_\_

---

- 3) Cuénteme como va todo en el colegio (escuela) o el trabajo.  
Tell me how things have been going at school or work. \_\_\_\_\_

---

- 4) Si pudiera cambiar una cosa sobre el colegio (escuela) o el trabajo ¿cuál sería?  
If you could change one thing about school or work, what would it be? \_\_\_\_\_

---

- 5) Cuénteme sobre la gente en su comunidad.  
Tell me about the people in your community. \_\_\_\_\_

---

- 6) ¿Qué tipo de cosas hacen como comunidad?  
What kinds of things do you do as a community? \_\_\_\_\_

---

- 7) ¿Qué ha aprendido sobre el COVID?  
What have you learned about COVID? \_\_\_\_\_

---

- 8) ¿De dónde y de que fuentes ha aprendido sobre COVID?  
From where and what sources have you learned about COVID? \_\_\_\_\_

---

- 9) ¿Qué significa distanciamiento social? ¿Por qué es importante o por qué no?  
What does social distancing mean? Why is it important or not important? \_\_\_\_\_

---

- 10) ¿Cuándo debe ponerse un tapabocas y de qué manera son útiles?  
When should you wear a mask and in what ways are they helpful? \_\_\_\_\_

---

11) ¿Qué significa para usted proteger la salud y seguridad de todos en su comunidad durante el COVID?

What does it mean for you to protect the health and safety of everyone in your community during COVID?

---

---

12) ¿Cuales son las estrategias que su familia y usted pueden utilizar para mantener su salud y seguridad durante el COVID?

What are strategies that you and your family can use to maintain health and safety during COVID?

---

---

13) ¿Qué preocupaciones tiene sobre el COVID?

What concerns do you have about COVID?

---

---

14) ¿Qué preocupaciones tiene sobre adquirir comida durante el COVID?

What concerns do you have about food during COVID?

---

---

15) ¿Qué preocupaciones tiene sobre su vivienda durante COVID?

What concerns do you have about housing during COVID?

---

---

16) ¿Qué preocupaciones tiene sobre su empleo durante COVID?

What concerns do you have about employment during COVID?

---

---

17) ¿Qué preocupación tiene sobre inmigración durante COVID? Esto puede incluir cosas como deportación, detención, y separación familiar.

What concerns do you have about immigration during COVID? This could include things like deportation, detention, and family separation.

---

---

18) ¿Qué significa para usted estar seguro en su casa durante COVID?

What does it mean for you to stay safely in your home during COVID?

---

---

19) ¿Cuales son las precauciones importantes de tomar cuando sale de casa durante COVID?

What are important precautions to take when leaving your home during COVID?

---

---

20) ¿Cuales son las razones adecuadas para salir de casa durante COVID?

What are appropriate reasons to leave your home during COVID?

---

---

21) ¿Qué cosas son importantes de hacer cuando una persona está enferma del COVID?

What things are important to do when a person is sick with COVID?

---

---

22) ¿Qué significa estar en aislamiento medico durante el COVID?

What is your understanding of medical isolation during COVID?

---

---

23) Si un miembro de su hogar o usted se enfermaran del COVID ¿cuales creen que serian los obstáculos para estar en aislamiento medico?

If you or a household member becomes sick with COVID, what challenges do you foresee in being about to medically isolate?

---

---

24) Si alguien en su familia se enferma, ¿a quién pueden contactar? ¿Donde podrían ir a hacerse la prueba? ¿Donde podrían ir para ser tratados? ¿Qué desafíos prevé en obtener la prueba o ser tratado?

If someone in your family gets sick, who could they contact? Where could they go to be tested? Where could they go to be treated? What challenges do you foresee in being able to get tested and treated?

---

---

25) ¿Alguien ha trabajado fuera de casa mientras alguien estaba enfermo? Si continuaron trabajando, ¿tomaron precauciones? ¿Utilizaron un tapabocas? ¿Les dieron equipo de protección personal (PPE)?

Has anyone continue to work outside the home while person was ill? If they continued to work, were precautions taken? Were they given masks? Were they given personal protective equipment (PPE)?

---

---

26) ¿Tiene otros comentarios?

Other comments?

---
